# Supplementary material for: Resolving uncertainties in the application of zircon Th / U and CL gauges to interpret U-Pb ages: a case study of eclogites in polymetamorphic terranes of NW Iberia
Source: Copernicus journal article supplement (doi:10.5194/se-2020-53), 2020-05-14
Supplement: Supplementary file 1 [file se-2020-53-supplement.pdf]

Table DR-1. SHRIMP-RG U-Th-Pb analytical data for zircon of the eclogite block-in-matrix in the Banded Gneiss Formation (Cabo Ortegal Complex, NW Iberia).

| Spot number and description <sup>a</sup>                                                         | Common <sup>206</sup> Pb (%) <sup>b</sup> | U (ppm) | Th (ppm) | Th/U | <sup>207</sup> Pb corrected             |                                                   | Uncorrected ratios                  |                                      |              |
|--------------------------------------------------------------------------------------------------|-------------------------------------------|---------|----------|------|-----------------------------------------|---------------------------------------------------|-------------------------------------|--------------------------------------|--------------|
|                                                                                                  |                                           |         |          |      | <sup>206</sup> Pb/ <sup>238</sup> U age | <sup>206</sup> Pb*/ <sup>238</sup> U <sup>c</sup> | <sup>238</sup> U/ <sup>206</sup> Pb | <sup>207</sup> Pb/ <sup>206</sup> Pb |              |
| <i>COZ-4: Eclogite block-in-matrix in the Banded Gneiss Formation. UTM: 0591082, 4842464, 2.</i> |                                           |         |          |      |                                         |                                                   |                                     |                                      |              |
| 1                                                                                                | s                                         | 0.94    | 48       | 6    | 0.14                                    | 384.3 ± 4.4                                       | 0.0614 ± 0.0007                     | 16.13 ± 1.1                          | 0.0619 ± 3.7 |
| 2.1                                                                                              | c,o                                       | 0.22    | 538      | 158  | 0.30                                    | 389.9 ± 1.6                                       | 0.0624 ± 0.0003                     | 16.00 ± 0.4                          | 0.0563 ± 1.2 |
| 2.2                                                                                              | r,h                                       | 0.48    | 1182     | 436  | 0.38                                    | 368.5 ± 1.2                                       | 0.0588 ± 0.0002                     | 16.92 ± 0.3                          | 0.0578 ± 1.0 |
| 3.1                                                                                              | c,mv                                      | 3.55    | 10       | 5    | 0.50                                    | 474.4 ± 11.2                                      | 0.0764 ± 0.0019                     | 12.63 ± 2.3                          | 0.0854 ± 6.1 |
| 3.2                                                                                              | r,sb                                      | 6.21    | 8        | 0    | 0.00                                    | 361.2 ± 11.5                                      | 0.0576 ± 0.0019                     | 16.27 ± 3.0                          | 0.1038 ± 7.8 |
| 4                                                                                                | s                                         | 0.50    | 116      | 14   | 0.13                                    | 383.8 ± 3.0                                       | 0.0614 ± 0.0005                     | 16.22 ± 0.8                          | 0.0583 ± 2.5 |
| 5                                                                                                | s                                         | 0.19    | 87       | 15   | 0.18                                    | 383.2 ± 3.3                                       | 0.0612 ± 0.0005                     | 16.30 ± 0.8                          | 0.0558 ± 2.9 |
| 6                                                                                                | o                                         | 0.28    | 266      | 76   | 0.29                                    | 391.1 ± 2.3                                       | 0.0625 ± 0.0004                     | 15.94 ± 0.6                          | 0.0567 ± 1.7 |
| 7                                                                                                | s                                         | 0.32    | 165      | 33   | 0.20                                    | 381.7 ± 2.7                                       | 0.0610 ± 0.0004                     | 16.34 ± 0.7                          | 0.0568 ± 2.0 |
| 8                                                                                                | o                                         | -0.08   | 1297     | 93   | 0.07                                    | 398.8 ± 1.1                                       | 0.0638 ± 0.0002                     | 15.68 ± 0.3                          | 0.0540 ± 0.8 |
| 9                                                                                                | o                                         | 0.14    | 983      | 281  | 0.30                                    | 391.5 ± 1.0                                       | 0.0626 ± 0.0002                     | 15.95 ± 0.3                          | 0.0556 ± 0.9 |
| 10                                                                                               | s                                         | 0.19    | 385      | 196  | 0.52                                    | 388.0 ± 1.9                                       | 0.0620 ± 0.0003                     | 16.09 ± 0.5                          | 0.0559 ± 1.4 |
| 11                                                                                               | o                                         | 0.05    | 250      | 29   | 0.12                                    | 403.1 ± 2.1                                       | 0.0645 ± 0.0003                     | 15.49 ± 0.5                          | 0.0552 ± 1.8 |
| 12                                                                                               | sb                                        | 0.70    | 65       | 13   | 0.20                                    | 401.1 ± 4.0                                       | 0.0642 ± 0.0007                     | 15.47 ± 1.0                          | 0.0604 ± 3.2 |
| 13                                                                                               | o                                         | 0.09    | 346      | 115  | 0.34                                    | 399.2 ± 1.7                                       | 0.0639 ± 0.0003                     | 15.64 ± 0.4                          | 0.0554 ± 1.5 |
| 14                                                                                               | o                                         | 0.18    | 108      | 16   | 0.15                                    | 391.6 ± 3.0                                       | 0.0626 ± 0.0005                     | 15.94 ± 0.7                          | 0.0560 ± 2.5 |
| 15                                                                                               | o                                         | 0.10    | 681      | 256  | 0.39                                    | 389.7 ± 1.3                                       | 0.0623 ± 0.0002                     | 16.03 ± 0.3                          | 0.0553 ± 1.0 |
| 16.1                                                                                             | c,o                                       | 0.70    | 65       | 9    | 0.14                                    | 394.3 ± 4.0                                       | 0.0631 ± 0.0007                     | 15.74 ± 1.0                          | 0.0602 ± 3.8 |
| 16.2                                                                                             | r,s                                       | 0.22    | 221      | 52   | 0.24                                    | 384.1 ± 2.2                                       | 0.0614 ± 0.0004                     | 16.25 ± 0.6                          | 0.0561 ± 1.9 |
| 17                                                                                               | d                                         | 0.13    | 105      | 36   | 0.35                                    | 388.8 ± 3.0                                       | 0.0622 ± 0.0005                     | 16.06 ± 0.8                          | 0.0555 ± 2.6 |

All errors are 1σ.

<sup>a</sup> Zircon characterization: c=core; d=domainal; h=homogeneous; mv=microveining; o=oscillatory; r=rim; s=sector; sb= soccer-ball.

<sup>b</sup> Negative values denote reversely discordant analyses.

<sup>c</sup> Pb\* denotes radioogenic lead

Table DR-2. U, Th, REE and Hf zircon compositional data for the eclogite sample.

| Spot number<br>and<br>description                                                         | Chondrite-normalized values |     |      |       |      |       |                    |      |      |      |    |     |     |     |     |     |     | Age |     |           |
|-------------------------------------------------------------------------------------------|-----------------------------|-----|------|-------|------|-------|--------------------|------|------|------|----|-----|-----|-----|-----|-----|-----|-----|-----|-----------|
|                                                                                           | Th                          | U   | Hf   | Th/U  | La   | Ce    | Pr <sub>calc</sub> | Nd   | Sm   | Eu   | Gd | Tb  | Dy  | Ho  | Er  | Tm  | Yb  |     | Lu  |           |
| COZ-4: Eclogite block-in-matrix in the Banded Gneiss Formation. UTM: 0591082, 4842464, 2. |                             |     |      |       |      |       |                    |      |      |      |    |     |     |     |     |     |     |     |     |           |
| 1                                                                                         | s                           | 12  | 78   | 9466  | 0.15 | 0.024 | 5.8                | 0.34 | 1.27 | 10.4 | 25 | 55  | 67  | 68  | 60  | 59  | 56  | 55  | 57  | 384 ± 4.4 |
| 4.2                                                                                       | s                           | 15  | 113  | 9340  | 0.13 | 0.023 | 7.5                | 0.21 | 0.65 | 6.3  | 17 | 41  | 58  | 62  | 62  | 56  | 52  | 52  | 46  | 384 ± 3.0 |
| 5.1                                                                                       | o+s                         | 11  | 70   | 8917  | 0.16 | 0.014 | 6.3                | 0.28 | 1.24 | 10.0 | 24 | 59  | 63  | 64  | 58  | 54  | 52  | 55  | 58  | 383 ± 3.3 |
| 7                                                                                         | s                           | 34  | 136  | 8807  | 0.25 | 0.078 | 8.2                | 0.72 | 2.18 | 16.3 | 37 | 94  | 120 | 130 | 126 | 107 | 85  | 86  | 73  | 382 ± 2.7 |
| 10.1                                                                                      | s                           | 203 | 370  | 8945  | 0.55 | 0.064 | 22.1               | 0.82 | 2.94 | 22.9 | 58 | 144 | 171 | 161 | 166 | 137 | 126 | 113 | 102 | 388 ± 1.9 |
| 16.2                                                                                      | s                           | 8   | 62   | 11022 | 0.13 | 0.018 | 6.6                | 0.11 | 0.26 | 3.0  | 8  | 18  | 19  | 21  | 20  | 19  | 24  | 24  |     | 384 ± 2.2 |
| 2.1                                                                                       | o                           | 148 | 374  | 9104  | 0.39 | 0.034 | 21.3               | 0.75 | 3.51 | 30.0 | 68 | 161 | 193 | 179 | 171 | 143 | 125 | 119 | 102 | 390 ± 1.6 |
| 6.1                                                                                       | s                           | 53  | 226  | 8593  | 0.23 | 0.019 | 17.5               | 0.47 | 2.40 | 20.5 | 52 | 128 | 165 | 163 | 150 | 129 | 117 | 105 | 90  | 391 ± 2.3 |
| 9.1                                                                                       | o                           | 289 | 921  | 10193 | 0.31 | 0.032 | 43.5               | 0.83 | 4.19 | 38.2 | 91 | 243 | 326 | 313 | 282 | 222 | 181 | 145 | 118 | 392 ± 1.0 |
| 14.1                                                                                      | o                           | 17  | 102  | 8814  | 0.17 | 0.022 | 9.2                | 0.34 | 1.33 | 11.6 | 28 | 74  | 93  | 88  | 82  | 71  | 62  | 57  | 57  | 392 ± 3.0 |
| 15                                                                                        | o                           | 255 | 702  | 11865 | 0.36 | 0.037 | 33.0               | 0.64 | 2.67 | 32.7 | 82 | 209 | 262 | 233 | 194 | 145 | 116 | 105 | 90  | 390 ± 1.3 |
| 16.1                                                                                      | s                           | 8   | 53   | 10250 | 0.16 | 0.039 | 6.1                | 0.18 | 0.39 | 3.9  | 10 | 22  | 24  | 22  | 20  | 19  | 16  | 18  | 22  | 394 ± 5.4 |
| 8.1                                                                                       | o                           | 86  | 1144 | 10528 | 0.08 | 0.018 | 13.5               | 0.25 | 0.96 | 11.6 | 32 | 87  | 138 | 151 | 146 | 128 | 123 | 118 | 109 | 399 ± 1.1 |
| 11                                                                                        | o+s                         | 18  | 162  | 11615 | 0.11 | 0.023 | 8.7                | 0.26 | 0.89 | 9.0  | 24 | 65  | 70  | 69  | 67  | 59  | 57  | 49  | 52  | 403 ± 2.1 |
| 13.1                                                                                      | o+s                         | 28  | 107  | 7645  | 0.26 | 0.089 | 6.9                | 1.01 | 3.40 | 17.4 | 39 | 82  | 90  | 81  | 83  | 72  | 67  | 63  | 65  | 399 ± 1.7 |
| 12                                                                                        | sb                          | 11  | 66   | 8969  | 0.17 | 0.018 | 5.6                | 0.17 | 0.51 | 5.1  | 13 | 32  | 39  | 35  | 35  | 31  | 26  | 25  | 22  | 401 ± 4.0 |
| 17.1                                                                                      | d                           | 35  | 115  | 9551  | 0.30 | 0.005 | 7.9                | 0.08 | 0.35 | 4.4  | 13 | 39  | 64  | 74  | 79  | 67  | 63  | 55  | 45  | 389 ± 3.0 |

NOTE.- Pr<sub>calc</sub> is calculated from La<sub>N</sub> and Nd<sub>N</sub> contents (Pr<sub>calc</sub>=La<sub>N</sub><sup>1/3</sup>\*Nd<sub>N</sub><sup>2/3</sup>). Zircon description: s=sector; o=oscillatory; o+s=oscillatory and sector; sb=socccer ball; d=domainal.
